## Modulation of muscle-tendon interaction in the human triceps surae during an energy dissipation task

Amelie Werkhausen<sup>1</sup>, Kirsten Albracht<sup>2,3</sup>, Neil J. Cronin<sup>4</sup>, Rahel Meier<sup>5</sup>, Jens Bojsen-Møller<sup>1</sup>, Olivier R. Seynnes<sup>1</sup>

<sup>1</sup> Norwegian School of Sport Sciences

<sup>2</sup> German Sport University Cologne

<sup>3</sup> University of Applied Sciences Aachen

<sup>4</sup> University of Jyväskylä

<sup>5</sup> ETH Zurich

### Corresponding author's email address

amelie.werkhausen@nih.no

### Key words

Achilles tendon, energy absorption, mechanical buffer

## Summary statement

During a simple landing task, the compliance of elastic structures and muscle activity modulate energy absorption and dissipation via active fascicle lengthening of the triceps surae fascicles.

## Abstract

The compliance of elastic elements allows muscles to dissipate energy safely during eccentric contractions. This buffering function is well documented in animal models but our understanding of its mechanism in humans is confined to non-specific tasks, requiring a subsequent acceleration of the body. The present study aimed to examine the behaviour of the human triceps surae muscle-tendon unit (MTU) during a pure energy dissipation task, under two loading conditions.

Thirty-nine subjects performed a single-leg landing task, with- and without added mass. Ultrasound measurements were combined with 3D kinematics and kinetics to determine instantaneous length changes of MTUs, muscle fascicles, Achilles tendon and combined elastic elements.

Gastrocnemius and soleus MTUs lengthened during landing. After a small concentric action, fascicles contracted eccentrically during most of the task, when the highest muscle activity occurred.

Combined elastic elements lengthened until peak ankle moment and recoiled thereafter, whilst no recoil was observed for the Achilles tendon. Adding mass resulted in greater negative work and MTU lengthening, which were accompanied by a greater stretch of tendon and elastic elements and a greater recruitment of the soleus muscle, without any further fascicle strain.

Hence, the buffering action of elastic elements delimits the maximal strain and lengthening velocity of active muscle fascicles and is commensurate with loading constraints. In the present task, energy dissipation was modulated via greater MTU excursion and more forceful eccentric contractions. The distinct strain pattern of the Achilles tendon supports the notion that different elastic elements may not systematically fulfil the same function.

## Introduction

The spring-like properties of elastic elements, i.e. tendinous or connective tissue, enhance the function of muscle-tendon units (MTU) of the lower limb in a variety of movements (Roberts & Azizi, 2011). During running, the body's potential energy is converted to elastic energy, which is stored in elastic elements and released to enhance movement efficiency (Fukunaga et al., 2001; Lichtwark & Wilson, 2006). During jumping, power output is increased by a rapid release of energy stored in elastic structures during muscle contraction (Farris et al., 2016; Kurokawa et al., 2001). Hence, the temporary storage of energy in elastic structures enables the uncoupling of muscle work from joint movement.

Evidence from animal studies indicates that tasks where energy dissipation is required may also benefit from such a mechanism. Using isolated preparations of plantar flexor muscles from cats and turkeys respectively, Griffiths (1991) and Roberts and Azizi (2010) have shown that rapid stretches of the MTU were taken up by elongation of the tendon. These *in situ* observations and subsequent *in vivo* studies have convincingly demonstrated that elastic structures provide a buffering mechanism that attenuates negative power input to the muscle. As shown during drop landings of turkeys, most of the lengthening of the MTU is taken up by tendon elongation, effectively delaying and slowing down fascicle lengthening to actively dissipate energy (Konow et al., 2012). Konow and Roberts (2015) attributed this mechanism to the double advantage of constraining the muscle to a favourable operating length and to a safer lengthening velocity. Despite the importance of such a mechanical buffer in daily activities where deceleration is required (e.g. walking down stairs or downhill, dropping from a ledge), energy dissipation does not seem to have been investigated systematically in humans.

A few studies have provided insight into the role of muscle and elastic elements when energy is dissipated in the human lower leg during locomotor tasks. These movements typically involve an initial deceleration of the body, followed by an acceleration in a different direction (e.g. countermovement jumps and stair descent). Kawakami et al. (2002) found that during the ankle dorsiflexion phase of a countermovement jump, gastrocnemius fascicles were passively lengthened for a short time before contracting isometrically, whilst the MTU lengthened. During stair descent, Spanjaard et al. (2007) reported that the fascicles of the gastrocnemius muscle shortened at first when ground reaction force increased and lengthened thereafter throughout the single support phase, whilst the MTU acted relatively isometrically. Thus, the deceleration required in these examples results in an uncoupling of muscle fascicle behaviour from that of the MTU, consistent with the buffering mechanism shown in animal studies. However, the subsequent acceleration inherent in such movements implies complex muscle-tendon behaviour, whereby energy is partly

dissipated and partly recycled to limit muscle work or to enhance mechanical power during the push-off phase. For instance, the relatively low muscle activity recorded during fascicle lengthening may reflect the necessity to limit energy dissipation when descending stairs. Consequently, the task of stair descent may not be optimal to investigate the role of muscle and elastic elements during energy dissipation. Additionally, the role of different elastic elements is unclear in the mentioned studies. Lichtwark and Wilson (2006) showed that during walking and running the strain of so-called “series elastic elements” can considerably differ from that of the Achilles tendon *per se*.

Hence, the objective of this study was to investigate the behaviour of muscle, tendon and elastic elements of the lower leg during a pure energy dissipation task. During a one-legged step landing, we predicted that elastic elements would buffer the rapid stretch of the triceps surae MTU, enabling muscle fascicles to operate at a limited range and velocity, but at a higher level of muscle activity than during locomotion. The stability of this mechanism under higher requirements for energy dissipation was tested in an additional experimental condition with added mass. Assuming an increase in energy absorption requirements, we expected an increase in the strain of the fascicles and/or an increase in force, which would be reflected by increased electromyographic (EMG) activity. Based on differences in fascicle behaviour observed between the biarticular gastrocnemius and the monoarticular soleus during locomotion (Cronin et al., 2013), both muscles were included in the analysis. Being monoarticular, the soleus muscle was expected to be more affected than the gastrocnemius by increased ankle flexion under the added mass condition and to display more pronounced changes (e.g. increases in fascicle strain and/or EMG activity). A secondary objective was to elucidate more specifically the role of the Achilles tendon during energy dissipation. As previously shown, the strain estimated during walking and running for so-called “series elastic elements” (essentially, Achilles tendon, aponeurosis and proximal tendon) can considerably differ from that of the Achilles tendon *per se* (Lichtwark & Wilson, 2006). We therefore measured length changes of the Achilles tendon and compared it to the calculated strain of combined elastic elements. Owing to their different mechanical properties, we expected distinctive strain patterns in the tendon and in combined elastic elements during energy dissipation, despite these structures often being referred to interchangeably.

## Materials and methods

### *Subjects*

Thirty-nine male athletes habitually engaged in ski jumping ( $n = 21$ , age  $23 \pm 3$  years, height  $179 \pm 6$  cm, and mass  $64 \pm 4$  kg) and distance running ( $n = 18$ , age  $27 \pm 5$  years, height  $180 \pm 5$  cm, and mass  $68 \pm 6$  kg)

took part in this study. The two types of athletes were initially recruited for a larger project. They were merged for this study after verifying the homogeneity of their anthropometric characteristics and the similarities of their triceps surae MTU properties (age  $25\pm 4$  years, height  $179\pm 6$  cm and mass  $66\pm 5$  kg). All subjects gave their written informed consent and the local ethical committee approved the study.

### *Protocol*

Resting anatomical measurements were performed prior to testing. Height, body mass, and right lower leg length (between the lateral malleolus and the lateral femur epicondyle) were measured for each subject. While the subjects were lying prone with the ankle joint at  $90^\circ$  (anatomical position), ultrasound images were recorded (LS128, Telemed, Vilnius Lithuania) to visualise the muscle architecture of the gastrocnemius medialis and soleus.

After a general warm up consisting of five minutes running on a treadmill at self-selected speed, subjects were then asked to perform a unilateral step landing task. The task was performed from a step height adjusted to individual body mass to standardise potential energy (240 Joules). Subjects were instructed to step down with their right leg whilst the left foot remained on the step to maintain balance. Five trials were performed to record ultrasound scans of the gastrocnemius medialis fascicles, and five additional trials were used to scan the gastrocnemius myotendinous junction. The size and strapping of the ultrasound probe did not allow simultaneous positioning of EMG sensors over the target muscles. For this reason, gastrocnemius, soleus and tibialis anterior EMG were recorded from the left leg in five separate trials. The fifteen landing trials were conducted twice, once with body mass only and once with a vest loaded with 20% of individual body mass.

### *Kinematics and kinetics*

During the step landing task, motion capture (12 cameras, Qualisys, Gothenburg, Sweden) was used to record the positions of 18 reflective markers placed on the right leg and the hips. A modified Cleveland marker set was used for the right lower extremities. Markers were placed on the left and right anterior and posterior iliac spines, to define the pelvis segment and hip joint centres (Bell et al., 1989). The right knee joint centre was defined as the mid-distance between the markers on the medial and lateral condyles. Likewise, the ankle joint centre was determined as the mid-point between the medial and lateral malleoli. To track the foot segment, markers were placed on the calcaneus and the metatarsals (1st, 2nd and 5th head). The thigh and shank segments were tracked with marker clusters consisting of four markers, placed mid-way on their respective lateral sides.

Force data were recorded on a force plate (M-Gait, Motekforce Link, Amsterdam, Netherlands) at a frequency of 1500 Hz.

Kinematic and kinetic data were analysed offline using a standard Newton-Euler inverse dynamics procedure (Visual 3D, C-Motion Inc., Germantown, MD, USA). Joint angles, moments and powers were expressed in the coordinate system of the respective proximal segment. Reference frames for all segments were defined during a standing reference measurement. Joint power was calculated as the product of the joint moment and the joint angular velocity. Data were filtered with a bidirectional 1st order low-pass Butterworth filter with a cut-off frequency of 15Hz (Kristianslund et al., 2012). Shank length was used in combination with ankle and knee joint angles to estimate MTU lengths of the gastrocnemius and soleus based on a frequently used regression equation (Hawkins & Hull, 1990). Strain velocities of MTUs were determined by differentiating their respective lengths.

#### *Muscle-tendon behaviour*

Muscle fascicles were imaged using ultrasound at a frame frequency of 80Hz. The transducer was positioned over the gastrocnemius and soleus muscle bellies to visualize fascicles and aponeuroses. The transducer was securely fastened to the skin with adhesive tape at the interface of a custom-made holder to avoid probe movement. Fascicle length and pennation angle were analysed using a semi-automated tracking algorithm (Cronin et al., 2011; Farris & Lichtwark, 2016). Fascicle length was defined as the length between the insertions to the superficial and deep aponeuroses. Pennation angle was defined as the angle between fascicles and the deep aponeurosis for gastrocnemius and as the angle between fascicles and the superficial aponeurosis for the soleus. The compound length of series-elastic elements was calculated as follows (Fukunaga et al., 2001):

$$L_{EE} = L_{MTU} - L_f \cdot \cos \alpha \quad (1)$$

where,  $L_{EE}$  is the length of the series elastic elements,  $L_f$  is the length of the fascicle and  $\alpha$  is the fascicle pennation angle. Velocities were calculated as the first derivatives of MTU and fascicle lengthening.

Ultrasound scans of the gastrocnemius medialis myotendinous junction in the line of action of the muscle were used to estimate tendon length. Three reflective markers forming a triangle were rigidly attached to the ultrasound transducer, which was secured to the skin. Marker positions were synchronously recorded with the Qualisys motion capture system. The position calibration of the transducer markers in relation to the ultrasound image plane allowed the calculation of position and orientation of the ultrasound image in the 3D laboratory coordinate system (Lichtwark & Wilson,

2005). The displacement of the myotendinous junction was analysed in the 2D ultrasound image using Tracker software (Tracker 4.95, physlets.org/tracker/). Achilles tendon length was estimated as the distance between the myotendinous junction and the calcaneus marker placed over the osteotendinous junction, as determined with ultrasound scanning. All ultrasound data were filtered similarly to kinematic and kinetic data.

### *Electromyography*

Gastrocnemius, soleus and tibialis anterior EMG were recorded from the left leg (TeleMyo DTS, Noraxon U.S.A Inc., Scottsdale, Arizona) at an acquisition frequency of 1500Hz. Electrode positioning and skin preparation were performed according to the SENIAM guidelines (Hermens et al., 2000). Data were treated offline with a bidirectional high-pass Butterworth filter with a cut-off frequency of 20Hz. After rectifying, the signal was filtered with a 6Hz bidirectional low-pass Butterworth filter (Maharaj et al., 2016). Within each subject, EMG data were normalised to the peak value reached during the step landing task without additional mass. Mean EMG values were calculated over the five trials of each subject. In some instances, one of the trials contained data points deviating from the mean by more than three times the standard deviation. These trials were excluded and the mean was re-calculated with the remaining four trials.

### *Data processing and statistical analysis*

Data were reduced to the landing phase corresponding to the generation of negative ankle power and resampled to 101 data points. In the case of EMG data recorded from the left leg, kinematic data were not available to identify the phase of negative power. Therefore, the landing phase was defined for this variable by matching ground reaction force (GRF) events recorded in both legs. For all variables, the analysed phase was divided into three sub-phases based on GRF (**Figure 1**): near constant force (phase 1), force rise (phase 2) and force decay (phase 3). Phase 1 started at the onset of negative ankle power and ended at the point where the fastest change in rate of GRF development occurred (as defined by the peak of the GRF 2<sup>nd</sup> derivative). Although force arguably increases throughout phases 1 and 2 the event closing the first phase was defined to offer an additional level of analysis, as it also coincides with a change in the lengthening patterns of the MTU and its components. The subsequent phase 2 ended at the time point of peak GRF. The third phase was defined as the remaining time period, where GRF decreased.

For each subject, a multiple correlation analysis was performed between the time-ankle angle curves to identify atypical trials. A correlation coefficient of  $\geq 0.95$  was required between at least four of the trials to ensure that retained data would reflect a consistent execution of the task for each individual. Additionally, to ensure tracking quality a coefficient of correlation above 0.90 for a given trial was required for inclusion. All data were analysed as the mean of at least four trials for each subject.

For statistical analysis, repeated measures one-way ANOVAs and Tukey's multiple comparisons were used to compare changes in length of the different MTU constituents during Phases 1, 2 and 3 ( $t_0$ ,  $t_1$ ,  $t_2$  and  $t_3$  respectively) (Prism, GraphPad Software Inc., La Jolla, CA). T-tests were performed to compare the changes in MTU and fascicle length between gastrocnemius and soleus muscles and between ankle and knee moment and power. To analyse the influence of mass conditions (body mass vs added mass), relevant peak values and changes occurring in the three phases were compared using t-tests. The alpha level was set to 0.05. The data are presented as mean  $\pm$  standard deviation (s.d.) in the text, tables and boxplots, and as mean  $\pm$  standard error of the mean (s.e.m.) in the figures for clarity.

## Results

The data sets recorded during the condition with added mass had to be discarded for two subjects whose ankle kinematics data did not meet the inclusion criteria (i.e. changes in ankle joint angle differed too much between trials). In addition, the soleus ultrasound data of four subjects were removed due to insufficient quality of the images of the fascicles. Hence, the data of 39 subjects were included in the final analysis of the task with body mass, 37 subjects for the task with added mass. For the variables obtained from soleus scans (length and velocity of soleus fascicle and MTU), the number of subjects in both conditions was 35 and 33, respectively.

### *Kinematics and kinetics*

Ankle and knee joint angle, moment and power measured during the landing phase are presented in **Figure 2**. Peak moment and power normalised to body mass were higher in the ankle joint ( $-1.79 \pm 0.29$  N m kg<sup>-1</sup>;  $-10.89 \pm 2.36$  W kg<sup>-1</sup>) than in the knee joint ( $-1.33 \pm 0.50$  N m kg<sup>-1</sup>,  $P \leq 0.01$ ;  $-4.92 \pm 3.09$  W kg<sup>-1</sup>,  $P \leq 0.01$ ) and occurred earlier in the ankle than in the knee joint.

In the condition with added mass, ankle dorsiflexion and knee flexion were greater than in the unloaded condition. For both joints, significantly higher peak moments and powers were produced



with added mass (**Figure 3A-E**). Adding mass resulted in an increase in negative work at the ankle joint from  $-58.06 \pm 13.03$  to  $-67.06 \pm 15.08$  Joules and the duration of the landing phase was prolonged by 10% ( $0.21 \pm 0.02$  s without- vs.  $0.24 \pm 0.02$  s with added mass).

#### *Muscle activity*

The EMG signals obtained from gastrocnemius, soleus and tibialis anterior muscles were normalised to peak values obtained during the phase of negative power, without added mass (**Figure 4**). All three muscles were activated during the negative power production period, with the greatest activity seen during the phase of force decay (phase 3). Additional mass increased the activity of soleus and tibialis anterior, but not that of gastrocnemius (**Figure 5**).

#### *Muscle-tendon measures*

The mean length of the fascicles at rest was  $59 \pm 10$  mm (mean  $\pm$  s.d.) and  $37 \pm 10$  mm for gastrocnemius and soleus, respectively. Both gastrocnemius and soleus MTUs lengthened significantly throughout the whole landing task (**Figure 6A**). A greater lengthening was observed for the soleus MTU than for the gastrocnemius MTU during phase three (5.5 mm vs. 4.0 mm, respectively,  $P \leq 0.01$ ). On the contrary, a larger strain was observed in gastrocnemius fascicles than in the soleus ( $P \leq 0.01$  in all three phases), despite parallel changes in all phases (shortening – lengthening – lengthening). The highest lengthening velocities of gastrocnemius and soleus MTUs were reached during phase two ( $539 \pm 155$  mm s<sup>-1</sup>;  $545 \pm 145$  mm s<sup>-1</sup>) (**Figure 7A**). Unlike MTUs, gastrocnemius and soleus fascicles shortened significantly in phase one and lengthened during the rest of the landing (**Table 1**, **Figure 6B**). Gastrocnemius fascicles lengthened at a faster velocity than soleus fascicles (peak velocities:  $214 \pm 50$  mm s<sup>-1</sup> and  $132 \pm 32$  mm s<sup>-1</sup>, respectively, **Figure 7B**). Peak fascicle velocity occurred later than peak MTU velocity. The Achilles tendon and all elastic elements lengthened between  $t_0$  and  $t_1$  as well as  $t_1$  and  $t_2$ . In the last phase (force decay, between  $t_2$  –  $t_3$ ), Achilles tendon length did not change significantly whereas elastic elements shortened. Achilles tendon lengthening during phase 2 (i.e. when negative power production was highest) was relatively lower (2.9 %) than that of the elastic elements as a whole (3.6 %) (**Table 1**; **Figure 6C,D**).

Adding mass to the subjects resulted in larger gastrocnemius and soleus MTU lengthening during phases two and three, when GRF and ankle moment were higher (**Figure 8A,B**). For soleus MTU a slight lengthening was also observed in the first phase, at low GRF and ankle moment levels. Length change of the Achilles tendon was significantly greater in phase two but not in phases one and three (**Figure 8E,F**), while elastic element length change differed significantly between mass conditions in

phases one and two. Contrarily, gastrocnemius and soleus muscle fascicle lengths did not differ significantly between experiments with body mass and added mass (**Figure 8C,D**).

## Discussion

Our results support the hypothesis of a buffering function of elastic structures enabled by a decoupling mechanism between the behaviour of the MTU, muscle fascicles and elastic structures during energy dissipation. These findings are consistent with animal studies describing the buffering and shock absorbing function of the tendon (Konow et al., 2012), and expand on previous studies of human triceps surae behaviour during movements requiring limited energy dissipation (countermovement and stair descent). Hence, in a pure energy dissipation task as that performed in the present study, stretching of elastic elements accommodates the initial lengthening of the MTU, but in contrast to other decelerating movements, energy is then quickly dissipated via early and active fascicle lengthening in both the gastrocnemius and soleus. A late recoil of combined elastic elements, but not the Achilles tendon solely, supports our hypothesis of distinct strain patterns of the two structures during energy dissipation.

### *The role of elastic structures in energy dissipation*

At the onset of negative power, when the joint moment increased slightly, ankle dorsiflexion caused a quasi-isometric followed by a small lengthening of gastrocnemius and soleus MTUs. A concomitant stretch of the tendon and combined elastic elements was observed, whereas gastrocnemius and soleus fascicles shortened (**Figure 6**). Energy is thus stored in elastic elements - not dissipated - at this stage and a counteracting plantarflexion moment is generated. In phase two, characterized by the greatest increase in force, ankle dorsiflexion led to further lengthening of the MTUs. Concurrently, tendon and combined elastic elements lengthened, though to a different extent. At the increased magnitude and velocity of MTU stretch, fascicles started to actively lengthen. Yet, the elongation of elastic elements enabled both gastrocnemius and soleus fascicles to lengthen at a slower rate than their respective MTUs (**Figure 7**). Hence, in addition to limiting the length of active fascicles, the uncoupling between fascicles and MTU behaviour enables a delayed, slower contraction of muscle fibres. In animal studies, the mitigation of fascicle lengthening velocity has been linked to a reduction in power input to the fascicles (Konow & Roberts, 2015). We could not apply the same invasive measurements in human subjects but power input to fascicles was likely limited here, via the buffering action of elastic elements. In support of this assumption, the delay in peak fascicle velocity during this phase enabled peak fascicle lengthening to be uncoupled from MTU

stretch (**Figure 7**). These findings, and the link between fascicle strain magnitude (e.g. Guilhem et al., 2016) or velocity and muscle damage, are congruent with a protective mechanism against damage. During force decay (phase three), MTUs lengthened at a much slower rate (about 9% of peak velocity). Elastic elements shortened, while the length of the Achilles tendon alone did not change. At the end position of the task, whereas no more negative power was produced at the ankle, the Achilles tendon was still strained by 6%, close to the maximal value recorded during the task. The different behaviour between elastic elements and the Achilles tendon highlights the importance of other elastic structures in the triceps surae MTU during energy dissipation. Apart from the proximal tendon, recent studies (Raiteri et al., 2016; Tilp et al., 2012) have shown the complex role of aponeuroses. Unlike tendons, the elasticity of aponeuroses does not depend on force alone and seems geared by the active state of muscles via changes in the orientation of their fibres. Changes in the pennation angle of fibres are associated with the muscle's architecture gear ratio, whereby changes in fibre length are partly dissociated with from muscle – and aponeuroses – strain patterns (Azizi et al., 2008). Although not measured in the present study, the gear ratio is reportedly more important during lengthening than shortening contractions (Azizi & Roberts, 2014) and may explain some of the differences seen between combined elastic elements and the Achilles tendon alone. Additionally, spring-like elements located in muscles (actin-myosin cross-bridges, titin and connective tissue) can store elastic energy during contraction (for review, see Roberts, 2016). The relative contribution of these elements, in series and in parallel with the tendon, is yet unknown and future studies should establish its functional significance during decelerating movements. However, it should be noted that this difference might partly be explained by methodological reasons, owing to the different techniques and assumptions related to length measurements of these tissues. While elastic element lengths were calculated based on changes in MTU length and muscle architecture, Achilles tendon length was measured directly, with the different possible sources of error such as the assumption of a two-dimensional conformation. Regardless of these considerations, the recoil or isometric behaviour of elastic structures during MTU lengthening drove further fascicle lengthening in the third phase. Taken together, fascicle lengthening and the highest EMG activity occurring during the end of the task indicate that energy was being dissipated in phase three, despite the shortening of the MTU.

The near constant fascicle lengthening and energy dissipation occurring during a pure energy dissipation task contrasts with previous observations from tasks requiring an acceleration of the body after ground contact. During drop jumps for instance, gastrocnemius fascicles were found to shorten throughout the contact phase, presumably to generate and retain the elastic energy used during push-off (Ishikawa et al., 2005). Closer to our experimental model, Spanjaard et al. (2007)

showed a lengthening of gastrocnemius fascicles during the single support phase of stair descent. However, differences in the timing of changes in EMG activity and fascicle length distinguish stair descent from the energy dissipation task of the present protocol. Unlike our findings, muscle activity was highest at touch down during stair descent, while negative ankle power increased and the fascicles were shortening. Lower activity levels were measured during the decrease in negative power, when fascicles lengthened, whereas we observed maximum activity of plantar flexor muscles in the corresponding phase. Low muscle activity during fascicle lengthening in stair descent indicates that energy is dissipated more slowly and may be recycled to perform the subsequent single support phase. The relatively large fascicle shortening and the delayed fascicle lengthening during stair descent may help to regulate the optimal tension within the MTU, favouring motor control more than energy dissipation in this task. This pattern is less marked in the present task, where the sole requirement is rapid and effective energy dissipation. Albeit hypothetical, differences between step landing and stair descent tasks may reflect a regulative mechanism, whereby energy in excess of that required to maintain the upright position is either dissipated or recycled towards acceleration of the centre of mass.

#### *Effect of added mass*

As expected, equipping the subjects with weighted vests increased ground reaction force and joint moment. The increase in EMG activity of the soleus muscle, but not in the gastrocnemius, with additional load may be explained by the different insertions of the two muscles (monoarticular vs. biarticular). In this condition, the greater ankle dorsiflexion caused a larger stretch of both MTUs, whereas lengthening of the bi-articular gastrocnemius MTU was partly offset by the increased knee flexion. An increased co-activation of the tibialis anterior muscle likely reflected the higher torque produced by the soleus muscle. Elastic structures acted to absorb the additional work at the ankle, as illustrated by a greater stretch of the tendon and all elastic elements during the second phase (**Figure 7H, K**). Consequently, fascicle lengthening remained unchanged in the added mass condition. Albeit speculative, the preserved fascicle strain in spite of higher negative work at the ankle may prevent strain-induced damage. Furthermore, limiting fascicle strain may prevent the muscle from operating over less advantageous regions of the force-length relationship (Katz, 1939). During the third phase, the greater lengthening of soleus and gastrocnemius MTUs caused by the added mass was not reflected by any significant difference in tendon, elastic elements or fascicle behaviour. This discrepancy may be ascribed to the larger variability of ultrasound-based measurements and the relatively small changes observed during this phase.

Overall, the increased stretch of tendon and elastic elements with added mass underlines the important role of these structures as a mechanism to control different demands of energy dissipation during human movement. This hypothesis is congruous with an earlier study examining the effects of increased demand for energy dissipation during stair descent by modulating step height (Spanjaard et al., 2008). Similarly to the added mass condition of our study, an increase in step height led to a greater stretch of elastic elements (Spanjaard et al., 2008). However, contrary to our findings, a higher demand for energy dissipation during stair descent caused an increase in fascicle shortening. In line with Spanjaard et al. (2008) and similar observations in animals by Konow and Roberts (2015), increasing body mass would be expected to induce larger fascicle shortening at the onset of the present task. Indeed, an initial shortening of fascicles allows a greater subsequent lengthening and may enable dissipation of more energy. The lack of change in fascicular behaviour with added mass may be ascribed to a different strategy of energy dissipation. As evidenced by the greater EMG activity of the soleus and the longer duration of fascicle lengthening, additional energy in the loaded condition was mainly dissipated via longer, more forceful eccentric contractions in the present task. This further suggests the central role of muscle activation in regulating the rate of energy dissipation according to the task constraints (i.e. complete deceleration or reacceleration of the centre of mass).

### *Conclusion*

During a task requiring energy dissipation, elastic structures of the human triceps surae buffer mechanical energy in a similar manner to that described in drop landings of animals. However, different patterns of muscle activity and fascicle lengthening found between this task and other movements involving eccentric actions suggest that this mechanism can be modulated differently, depending on the movement characteristics. The temporary storage of elastic energy is commensurate with loading constraints to limit the maximal strain and lengthening velocity of muscle fascicles. Additional energy is absorbed during a longer phase of energy absorption and seems to be dissipated via higher force production of the soleus and longer lasting eccentric contractions. Under the present experimental conditions, the behaviour of the Achilles tendon appeared similar but not identical to that of all elastic elements, implying that the function of the two structures cannot be studied interchangeably. Finally, our results show that the pattern of fascicle lengthening during active energy dissipation is similar in the bi-articular gastrocnemius and in the mono-articular soleus. However, the two muscles may contribute differently to an increased demand for energy dissipation.

## List of symbols and abbreviations

Muscle-tendon unit - MTU

## Acknowledgements

We thank Cordula Schmidt for her support during the data collection.

## Competing interests

The authors declare no competing or financial interests.

## Author contributions

A.W., K.A, N.J.C., J.B.M. and O.R.S. were involved in the conception and design of research. A.W. and R.M. performed experiments and analysed data. A.W. and O.R.S. drafted the manuscript. All authors edited, revised and approved the final version of the manuscript.

## Funding

This study was funded by the Norwegian School of Sport Sciences.

## References

- Azizi, E., Brainerd, E. L., & Roberts, T. J. (2008). Variable gearing in pennate muscles. *PNAS*, 105(5), 1745-1750.
- Azizi, E., & Roberts, T. J. (2014). Geared up to stretch: pennate muscle behavior during active lengthening. *J. Exp. Biol.*, 217(3), 376-381.
- Bell, A. L., Brand, R. A., & Pedersen, D. R. (1989). Prediction of hip joint centre location from external landmarks. *Hum. Mov. Sci.*, 8(1), 3-16.
- Cronin, N. J., Avela, J., Finni, T., & Peltonen, J. (2013). Differences in contractile behaviour between the soleus and medial gastrocnemius muscles during human walking. *J. Exp. Biol.*, 216(5), 909-914.
- Cronin, N. J., Carty, C. P., Barrett, R. S., & Lichtwark, G. (2011). Automatic tracking of medial gastrocnemius fascicle length during human locomotion. *J. Appl. Physiol.*, 111(5), 1491-1496.
- Farris, D. J., & Lichtwark, G. A. (2016). UltraTrack: Software for semi-automated tracking of muscle fascicles in sequences of B-mode ultrasound images. *Comput. Methods Programs Biomed.*, 128, 111-118.
- Farris, D. J., Lichtwark, G. A., Brown, N. A. T., & Cresswell, A. G. (2016). The role of human ankle plantar flexor muscle-tendon interaction and architecture in maximal vertical jumping examined in vivo. *J. Exp. Biol.*, 219(4), 528.
- Fukunaga, T., Kubo, K., Kawakami, Y., Fukashiro, S., Kanehisa, H., & Maganaris, C. N. (2001). In vivo behaviour of human muscle tendon during walking. *Proc. R. Soc. Lond. B. Biol. Sci.*, 268(1464), 229-233.
- Griffiths, R. I. (1991). Shortening of muscle fibres during stretch of the active cat medial gastrocnemius muscle: the role of tendon compliance. *J. Physiol.*, 436, 219-236.
- Guilhem, G., Doguet, V., Hauraix, H., Lacourpaille, L., Jubeau, M., Nordez, A., & Dorel, S. (2016). Muscle force loss and soreness subsequent to maximal eccentric contractions depend on the amount of fascicle strain in vivo. *Acta Physiol.*, 217(2), 152-163.
- Hawkins, D., & Hull, M. L. (1990). A method for determining lower extremity muscle-tendon lengths during flexion/extension movements. *J. Biomech.*, 23(5), 487-494.
- Hermens, H. J., Freriks, B., Disselhorst-Klug, C., & Rau, G. (2000). Development of recommendations for SEMG sensors and sensor placement procedures. *J. Electromyogr. Kinesiol.*, 10(5), 361-374.
- Ishikawa, M., Niemelä, E., & Komi, P. V. (2005). Interaction between fascicle and tendinous tissues in short-contact stretch-shortening cycle exercise with varying eccentric intensities. *J. Appl. Physiol.*, 99(1), 217-223.
- Katz, B. (1939). The relation between force and speed in muscular contraction. *J. Physiol.*, 96(1), 45-64.
- Kawakami, Y., Muraoka, T., Ito, S., Kanehisa, H., & Fukunaga, T. (2002). In vivo muscle fibre behaviour during counter-movement exercise in humans reveals a significant role for tendon elasticity. *J. Physiol.*, 540(2), 635-646.
- Konow, N., Azizi, E., & Roberts, T. J. (2012). Muscle power attenuation by tendon during energy dissipation. *Proc. R. Soc. Lond. B. Biol. Sci.*, 279(1731), 1108.
- Konow, N., & Roberts, T. J. (2015). The series elastic shock absorber: tendon elasticity modulates energy dissipation by muscle during burst deceleration. *Proc. R. Soc. Lond. B. Biol. Sci.*, 282(1804).
- Kristianslund, E., Krosshaug, T., & van den Bogert, A. J. (2012). Effect of low pass filtering on joint moments from inverse dynamics: Implications for injury prevention. *J. Biomech.*, 45(4), 666-671.
- Kurokawa, S., Fukunaga, T., & Fukashiro, S. (2001). Behavior of fascicles and tendinous structures of human gastrocnemius during vertical jumping. *J. Appl. Physiol.*, 90(4), 1349-1358.
- Lichtwark, G. A., & Wilson, A. M. (2005). In vivo mechanical properties of the human Achilles tendon during one-legged hopping. *J. Exp. Biol.*, 208(24), 4715-4725.

- Lichtwark, G. A., & Wilson, A. M. (2006). Interactions between the human gastrocnemius muscle and the Achilles tendon during incline, level and decline locomotion. *J. Exp. Biol.*, 209(21), 4379-4388.
- Maharaj, J. N., Cresswell, A. G., & Lichtwark, G. A. (2016). The mechanical function of the tibialis posterior muscle and its tendon during locomotion. *J. Biomech.*, 49(14), 3238-3243.
- Raiteri, B. J., Cresswell, A. G., & Lichtwark, G. A. (2016). Three-dimensional geometrical changes of the human tibialis anterior muscle and its central aponeurosis measured with three-dimensional ultrasound during isometric contractions. *PeerJ*, 4, e2260.
- Roberts, T. J., & Azizi, E. (2010). The series-elastic shock absorber: tendons attenuate muscle power during eccentric actions. *J. Appl. Physiol.*, 109(2), 396-404.
- Roberts, T. J., & Azizi, E. (2011). Flexible mechanisms: the diverse roles of biological springs in vertebrate movement. *J. Exp. Biol.*, 214(3), 353-361.
- Spanjaard, M., Reeves, N. D., van Dieën, J. H., Baltzopoulos, V., & Maganaris, C. N. (2007). Gastrocnemius muscle fascicle behavior during stair negotiation in humans. *J. Appl. Physiol.*, 102(4), 1618-1623.
- Spanjaard, M., Reeves, N. D., van Dieën, J. H., Baltzopoulos, V., & Maganaris, C. N. (2008). Lower-limb biomechanics during stair descent: influence of step-height and body mass. *J. Exp. Biol.*, 211(9), 1368-1375.
- Tilp, M., Steib, S., & Herzog, W. (2012). Length changes of human tibialis anterior central aponeurosis during passive movements and isometric, concentric, and eccentric contractions. *Eur. J. Appl. Physiol.*, 112(4), 1485-1494.



## Figures

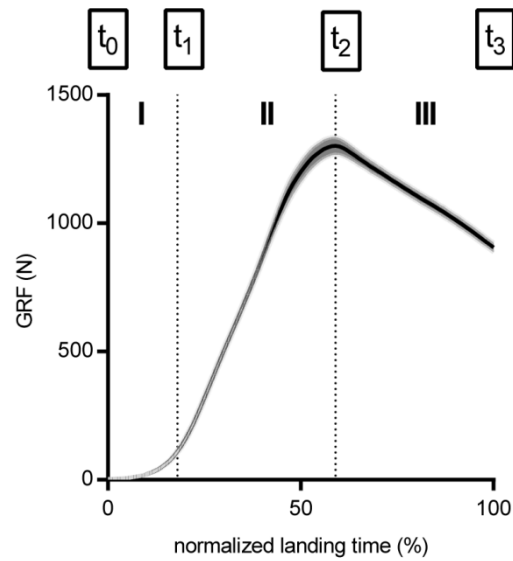

**Figure 1. Ground reaction force (GRF) during the energy dissipation task.**

All data were obtained between  $t_0$  and  $t_3$ , corresponding to the onset and the end of negative ankle power respectively. Three sub-phases (I, II and III) were determined by calculating the maximum change in rate of force development ( $t_1$ ) and the peak force ( $t_2$ ).

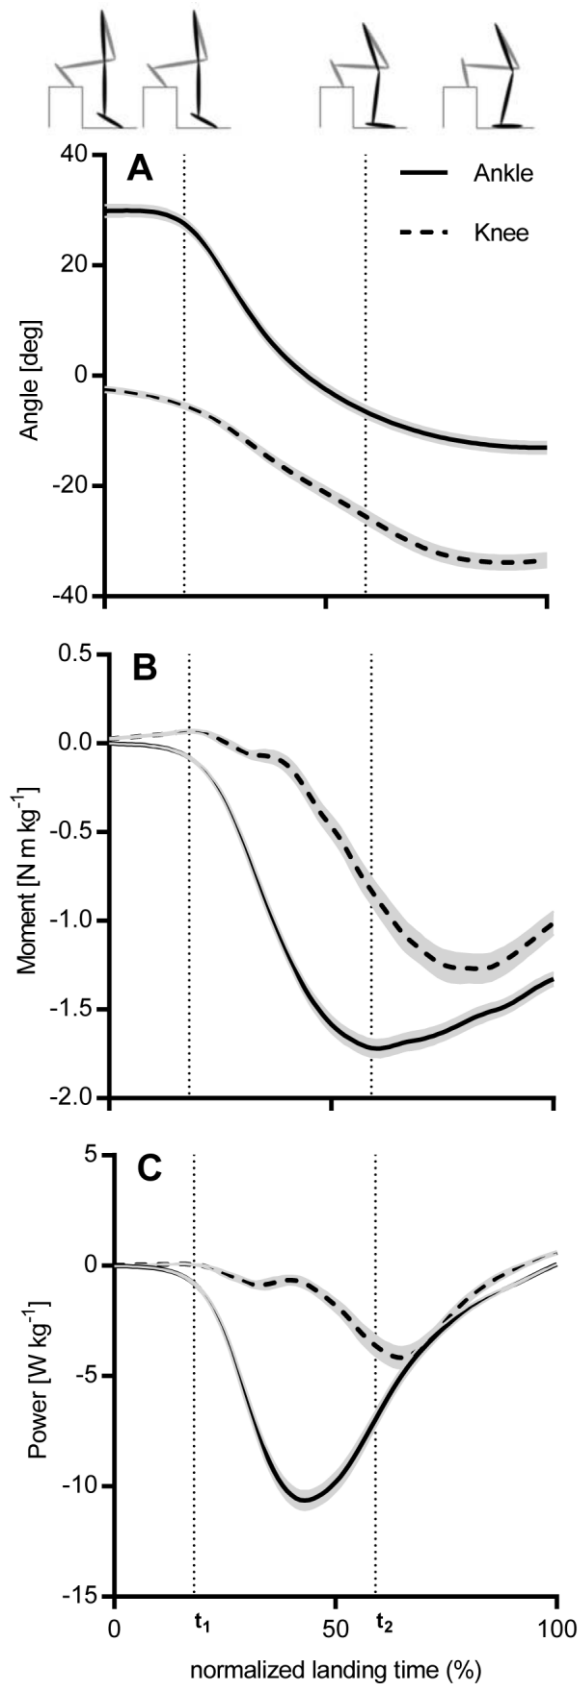

**Figure 2. Joint angle (A), normalised moment (B) and normalised power (C) at the ankle and knee joints during energy absorption in the body mass condition.**

Data are mean ( $\pm$  s.e.m.). Time series are normalised to 101 points. Negative changes in angle correspond to ankle dorsiflexion and knee flexion ( $0^\circ$  corresponds to anatomical position). Moment and power are normalised to body mass. Vertical dotted lines represent the time points of the highest rate of ground reaction force development ( $t_1$ ) and peak ground reaction force ( $t_2$ ).

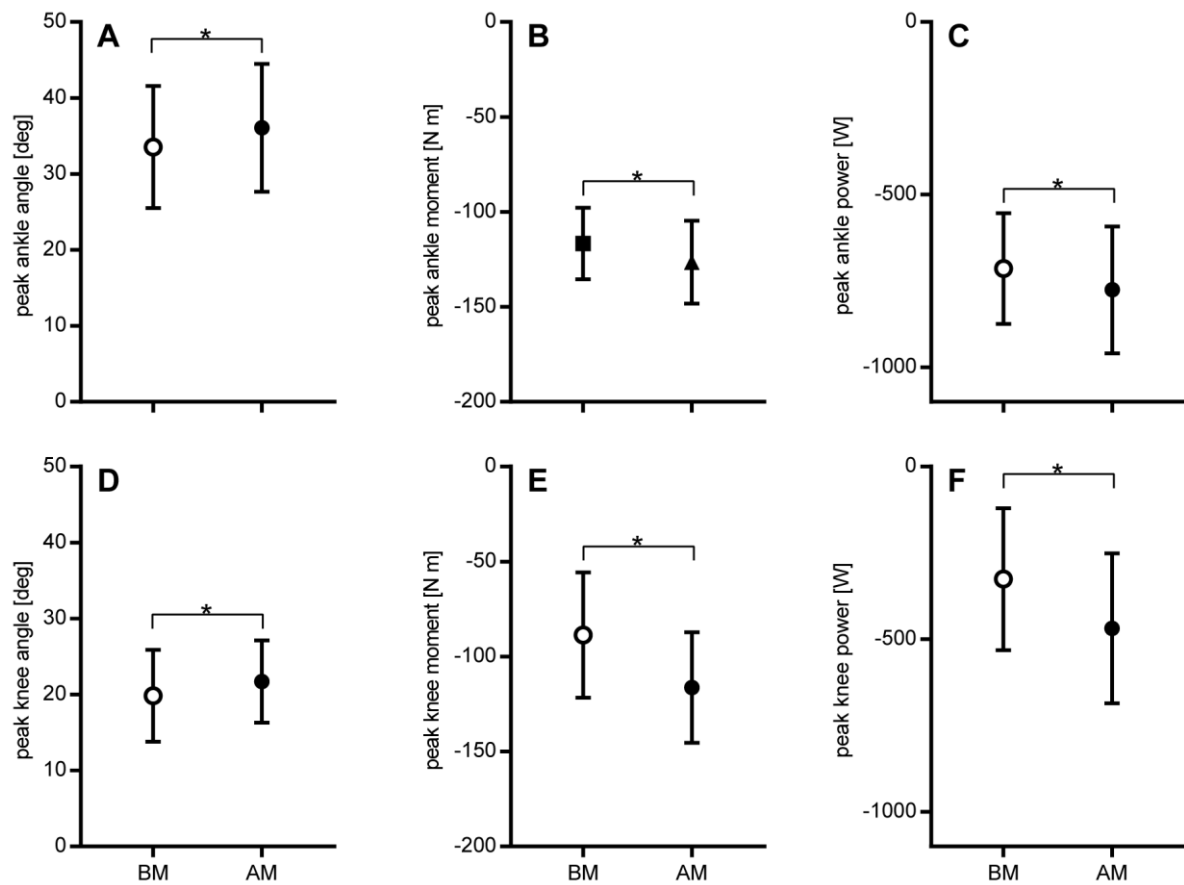

**Figure 3. Comparison of peak values of ankle (A-C) and knee (D-F) angle, moment and power between trials with body mass (BM) and 20% added mass (AM) during energy absorption.**

Data are mean ( $\pm$  s.d.). \*P < 0.05 when compared to the other condition.

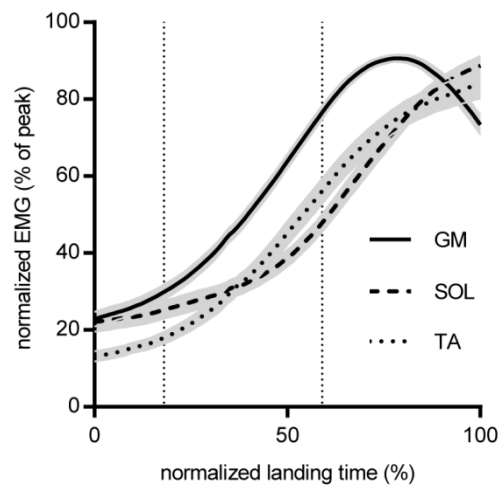

**Figure 4. Electromyographic (EMG) activity of gastrocnemius medialis (GM), soleus (SOL) and tibialis anterior (TA) during energy absorption in the body mass condition.**

Data are mean ( $\pm$  s.e.m.). Time series are normalised to 101 points. Values were normalised to peak values during the stepping down task. Vertical dotted lines represent the time points of the highest rate of ground reaction force development ( $t_1$ ) and peak ground reaction force ( $t_2$ ).

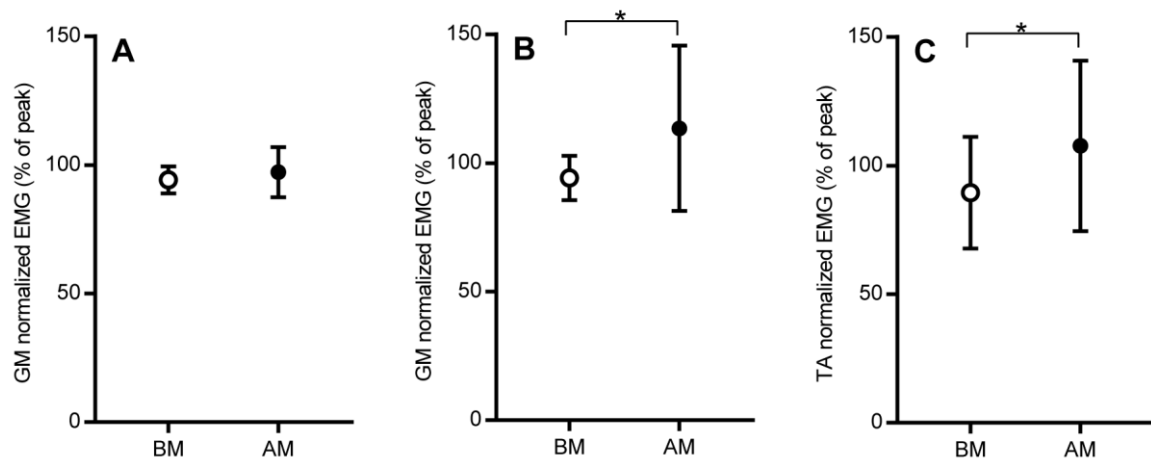

**Figure 5. Comparison of peak electromyographic (EMG) activity occurring during energy absorption, with (AM) and without (BM) added mass.**

Data are mean ( $\pm$  s.d.). Data from gastrocnemius medialis (A), soleus (B) and tibialis anterior (C) muscles are normalised to peak values obtained during the entire stepping down task. \*P < 0.05 when compared to the other condition. GM: gastrocnemius medialis, SOL: Soleus, TA: tibialis anterior.

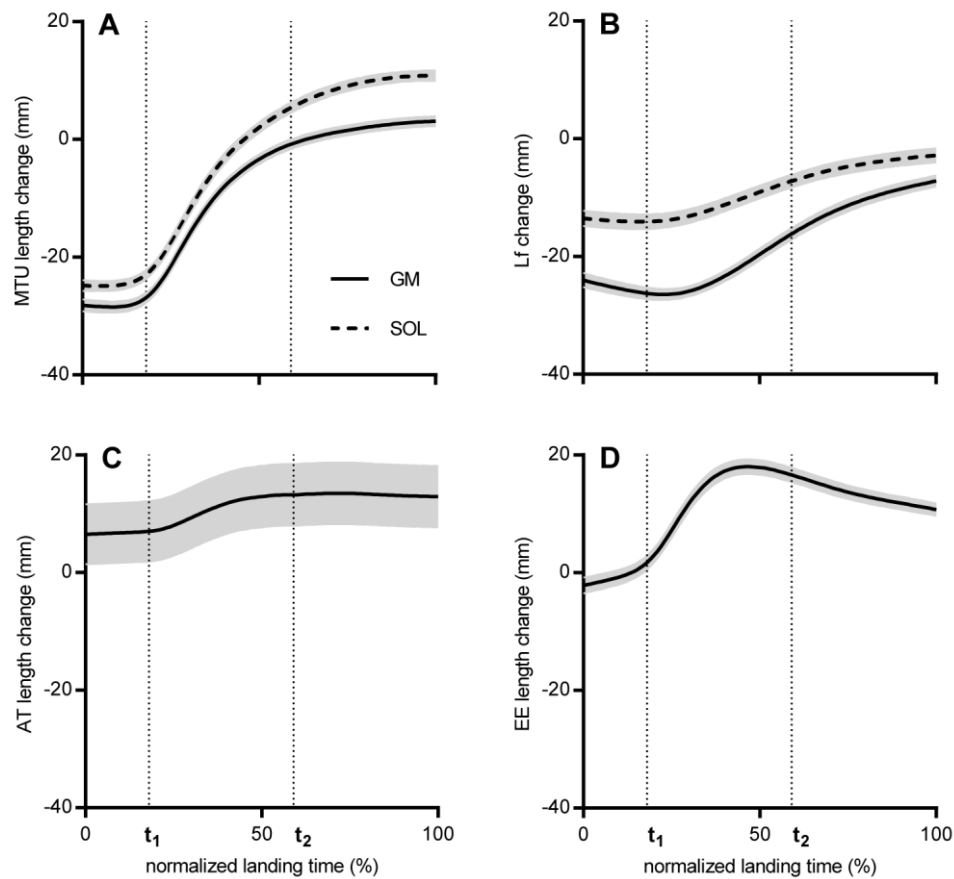

**Figure 6. Instantaneous length changes of muscle-tendon unit (A), fascicles (B), Achilles tendon (C) and elastic elements (D) in the unloaded condition during energy absorption.**

Data are mean ( $\pm$  s.e.m.). Time series are normalised to 101 points. Data are displayed as difference to resting lengths measured when laying prone in anatomical position. Vertical dotted lines represent the time points of the highest rate of ground reaction force development ( $t_1$ ) and of peak ground reaction force ( $t_2$ ). MTU: muscle-tendon unit, Lf: length of fascicles, AT: Achilles tendon, EE: elastic elements.

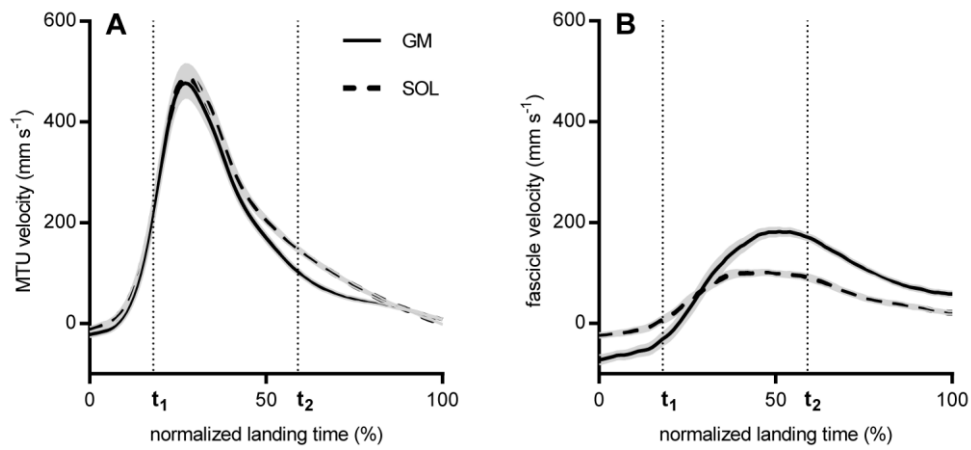

**Figure 7. Instantaneous muscle-tendon unit (A) and fascicle (B) velocity of gastrocnemius medialis (GM) and soleus (SOL) during energy absorption.**

Data are mean ( $\pm$  s.e.m.). Time series are normalised to 101 points. Vertical dotted lines represent the time points of the highest rate of ground reaction force development ( $t_1$ ) and of peak ground reaction force ( $t_2$ ).



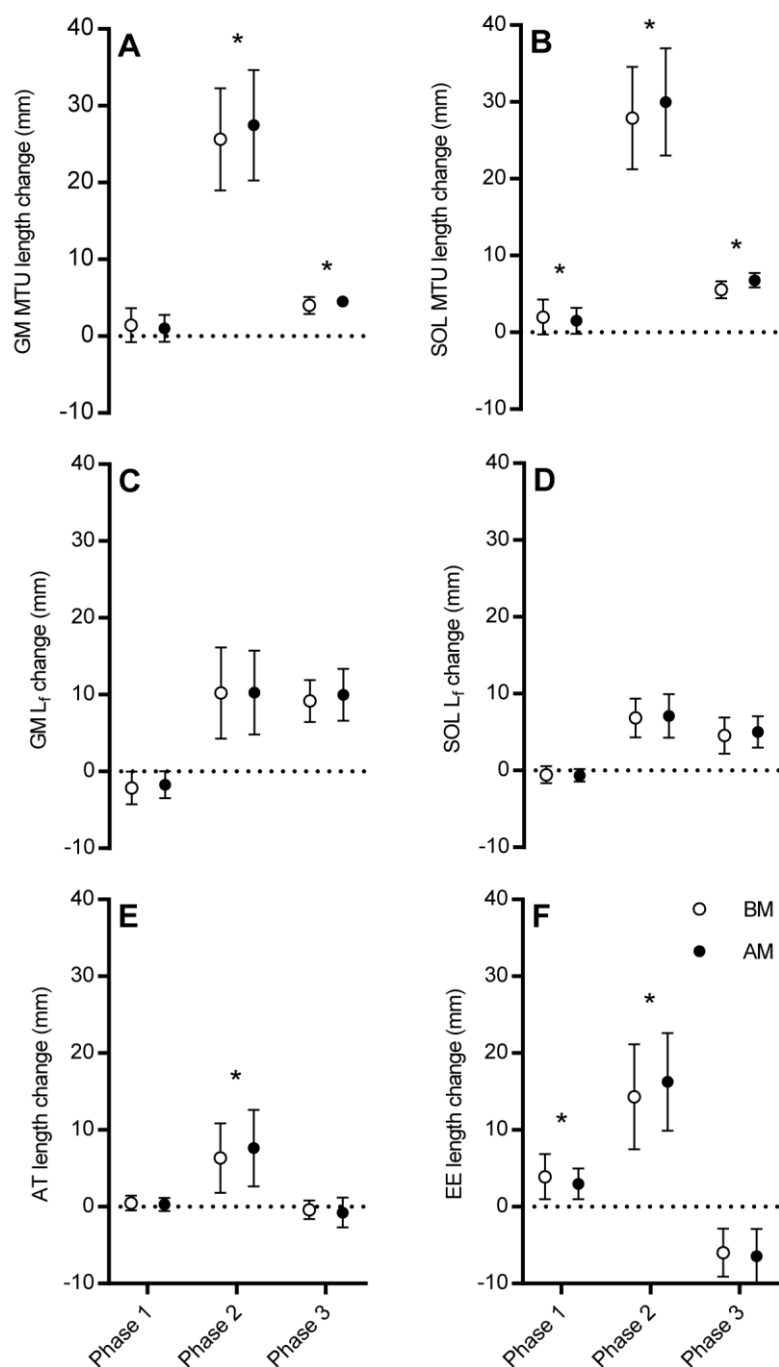

**Figure 8. Length changes of components of the muscle-tendon unit (MTU) during the landing task, with (AM) and without (BM) added mass.**

Data are mean ( $\pm$  s.d.) changes in gastrocnemius medialis (GM) muscle-tendon unit length (A), soleus (SOL) muscle-tendon unit length (B), GM fascicle length (C), soleus fascicle length (D), Achilles tendon length (E), and elastic elements length (F). Sub-phases are based on ground reaction force: near constant force (phase 1), force rise (phase 2) and force decay (phase 3). \*P < 0.05 when compared to the other condition. MTU: muscle-tendon unit, L<sub>f</sub>: length of fascicles, AT: Achilles tendon, EE: elastic elements.

**Table 1. Mean ( $\pm$  s.d.) length changes relative to the length at  $t_0$  of elastic elements (EE), Achilles tendon, gastrocnemius medialis (GM) and soleus (SOL) muscle-tendon unit (MTU) and fascicles at selected time points in the unloaded condition.**

|       | MTU GM<br>[mm]  | MTU SOL<br>[mm] | $L_{\text{fascicle}}$ GM<br>[mm] | $L_{\text{fascicle}}$ SOL<br>[mm] | Achilles<br>Tendon [mm] | EE<br>[mm]      |
|-------|-----------------|-----------------|----------------------------------|-----------------------------------|-------------------------|-----------------|
| $t_1$ | 1.3 $\pm$ 2.1*  | 1.9 $\pm$ 2.1*  | -2.3 $\pm$ 2.2*                  | -0.5 $\pm$ 1.2*                   | 0.5 $\pm$ 1.0*          | 3.9 $\pm$ 2.6*  |
| $t_2$ | 27.4 $\pm$ 7.4* | 30.2 $\pm$ 7.3* | 7.6 $\pm$ 6.9*                   | 6.3 $\pm$ 3.5*                    | 6.7 $\pm$ 4.4*          | 18.7 $\pm$ 7.9* |
| $t_3$ | 31.3 $\pm$ 7.2* | 35.6 $\pm$ 7.2* | 16.8 $\pm$ 6.6*                  | 10.6 $\pm$ 3.2*                   | 6.4 $\pm$ 4.2           | 12.9 $\pm$ 7.4* |

$t_0$ , onset of negative ankle power;  $t_1$ , highest rate of ground reaction force development;  $t_2$ , peak ground reaction force;  $t_3$ , end of negative ankle power. \*P < 0.05 when compared to the preceding event.
